# Supplementary material
Source: PubMed Central journal article supplement (PMC4609294)

Supplementary Figure

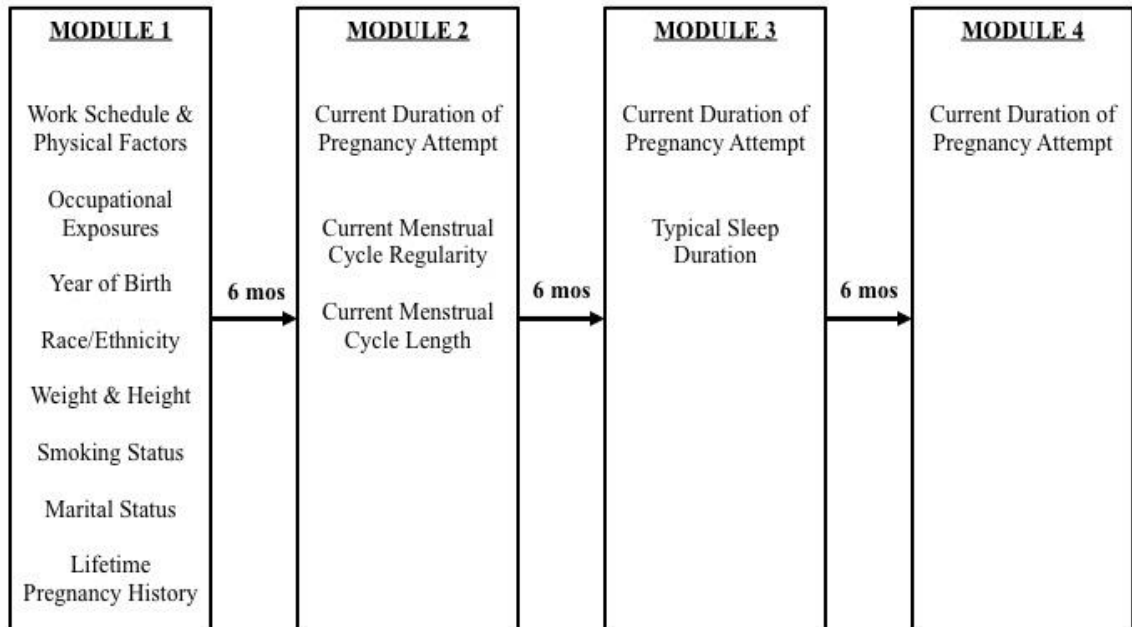

Supplement: NIHMS723385-supplement-supp_figure.pdf [file NIHMS723385-supplement-supp_figure.pdf]
